# Supplementary material for: Whole-Genome Doubling Affects Pre-miRNA Expression in Plants
Source: MDPI journal article supplement (doi:10.3390/plants10051004), 2021-05-18
Supplement: s1 [file s1]

**Table S1.** Number of common, 2x- and 4x-specific pre-miRNAs identified in each species studied here.

| <b>Species</b>        | <b>Tissue</b> | <b>2x-specific</b> | <b>common 2x-4x</b> | <b>4x-specific</b> |
|-----------------------|---------------|--------------------|---------------------|--------------------|
| <i>M. alba</i>        | leaves        | 2                  | 30                  | 6                  |
| <i>A. thaliana</i>    | sepals        | 17                 | 89                  | 12                 |
| <i>S. commersonii</i> | leaves        | 11                 | 118                 | 46                 |
| <i>B. rapa</i>        | floral buds   | 67                 | 154                 | 41                 |
| <i>I. indigotica</i>  | leaves        | 18                 | 56                  | 11                 |

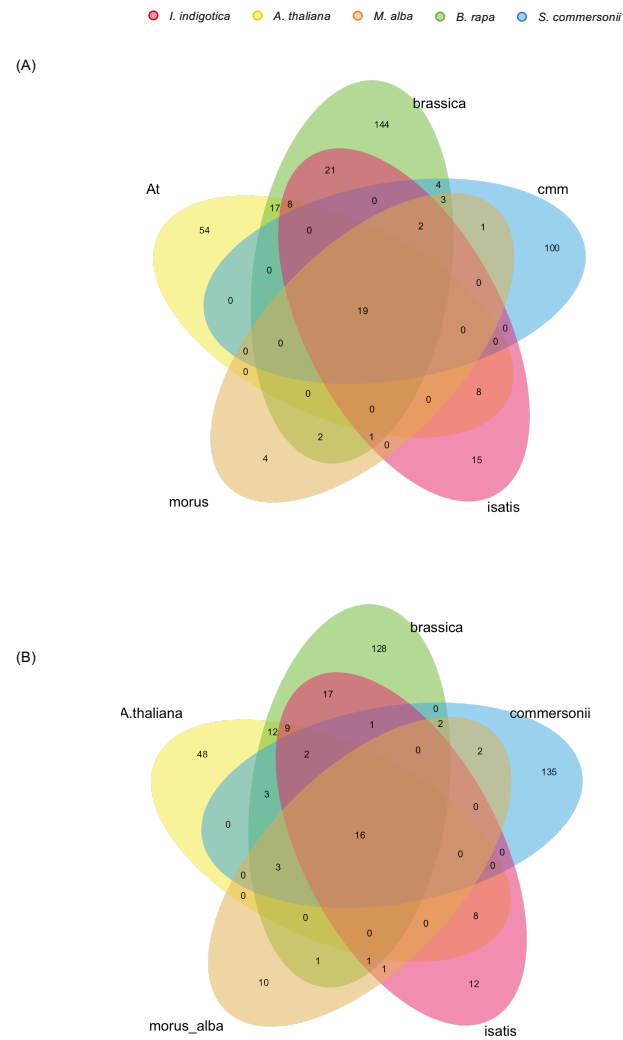

Figure S1

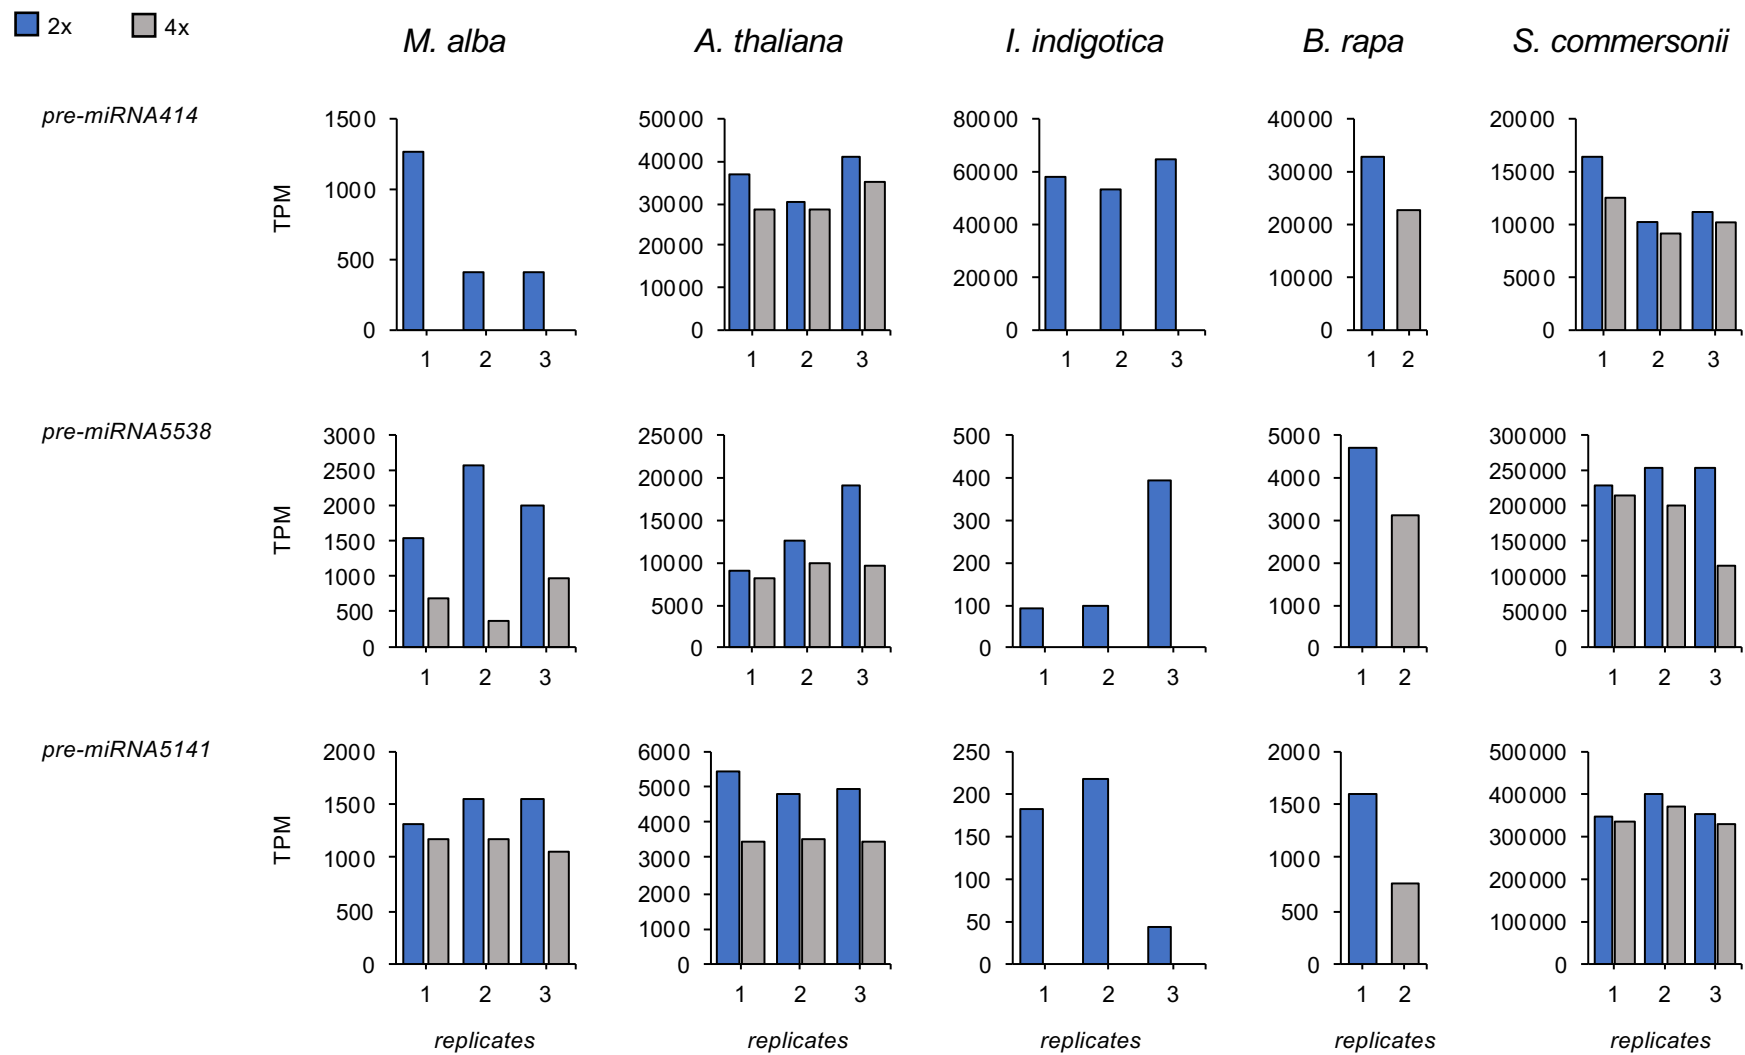

Figure S2

A)

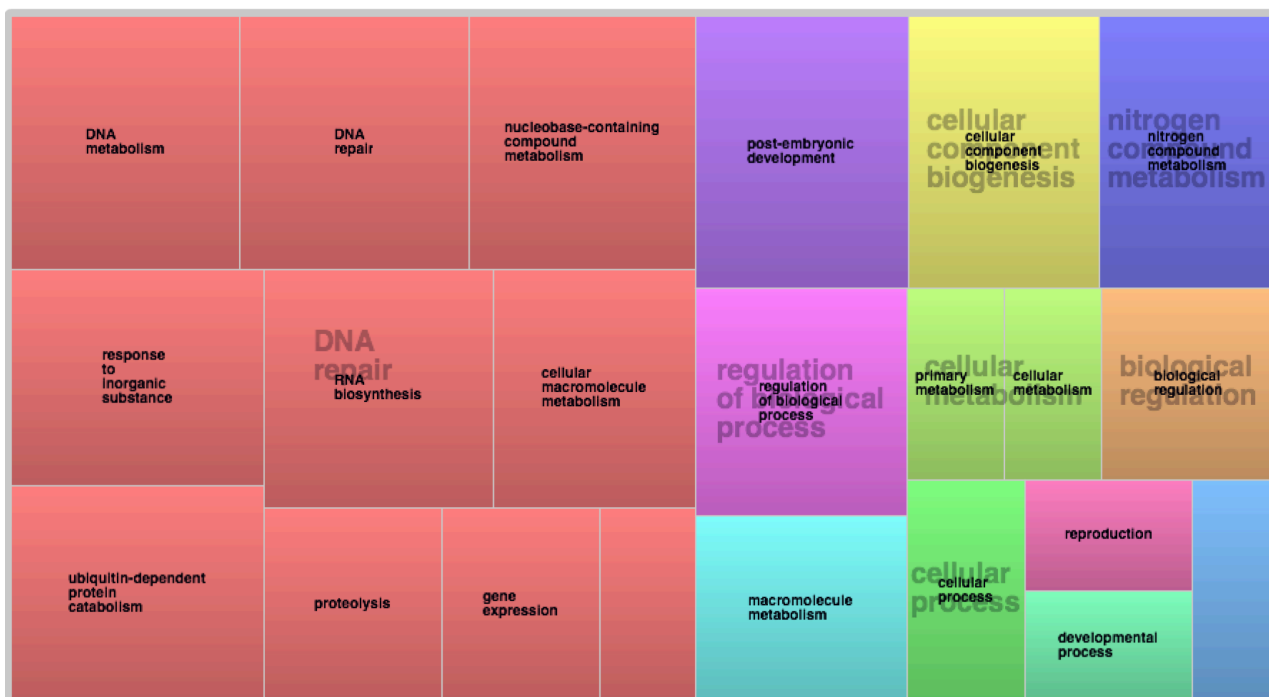

B)

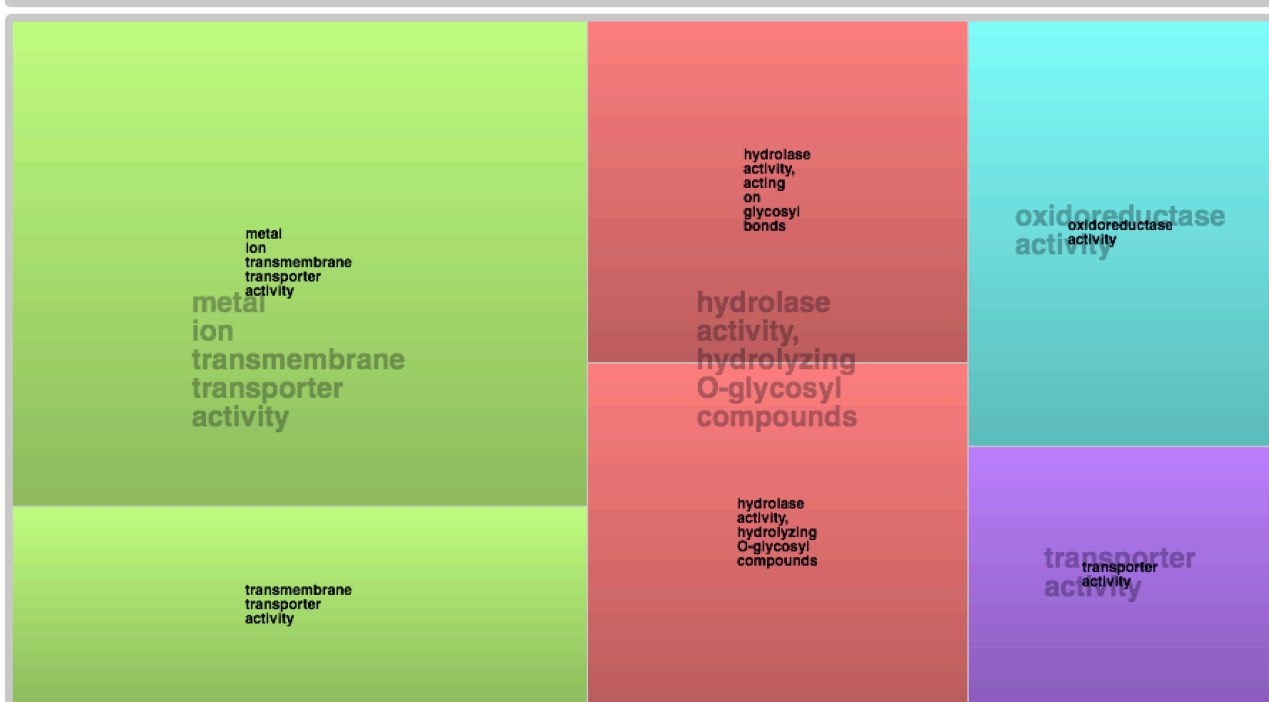

C)

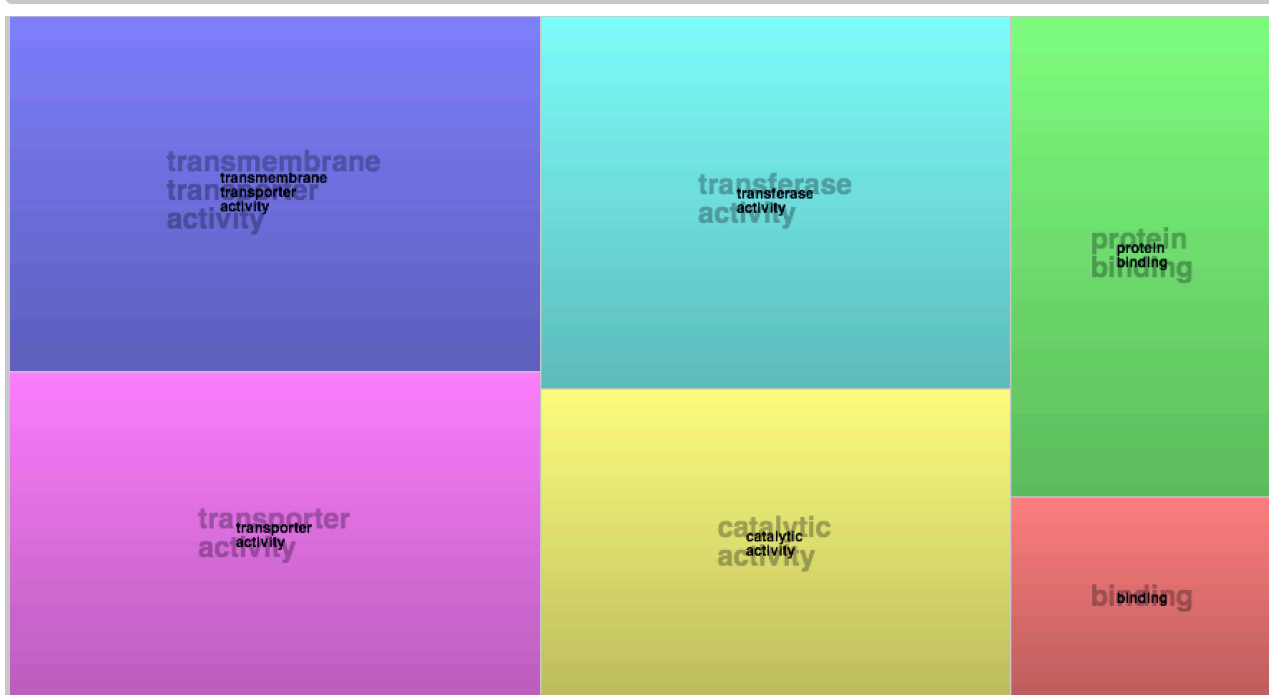

Figure S3

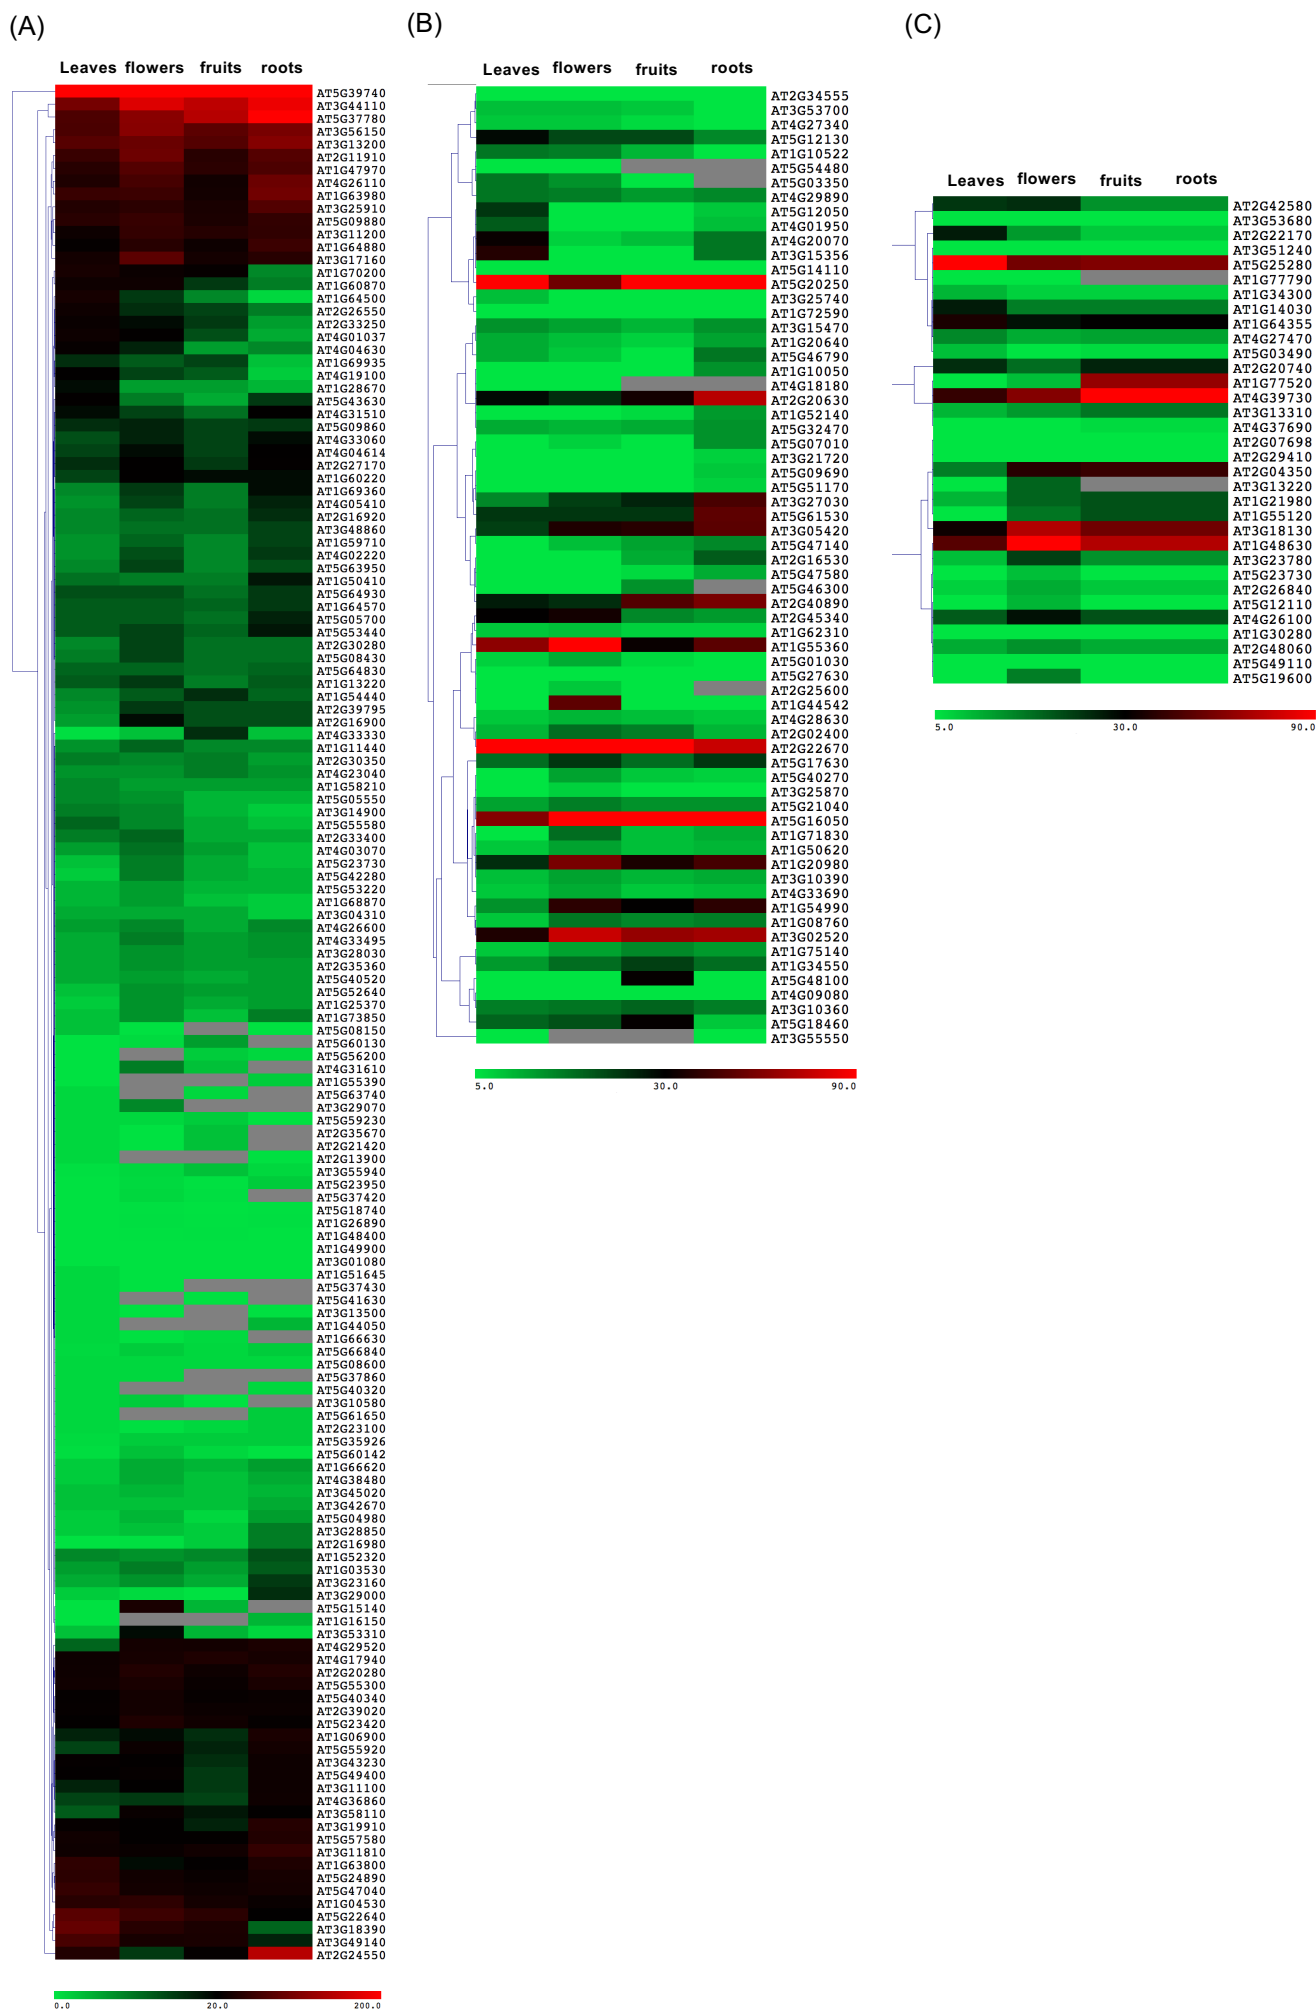

Figure S4

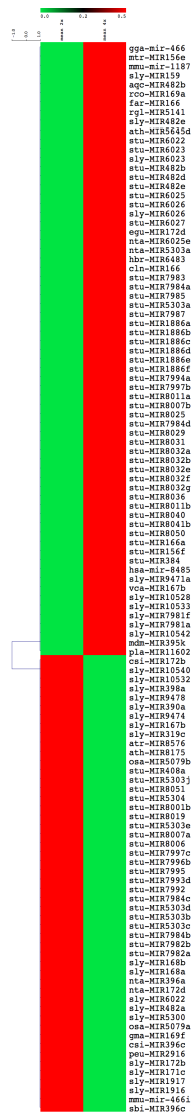

Figure S5

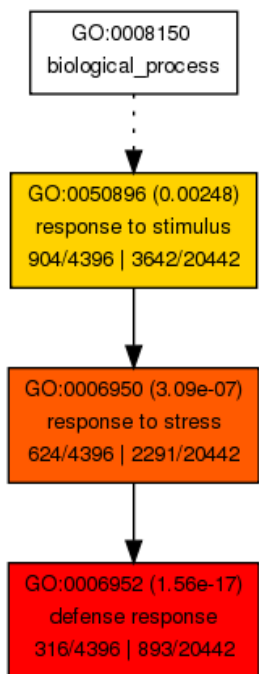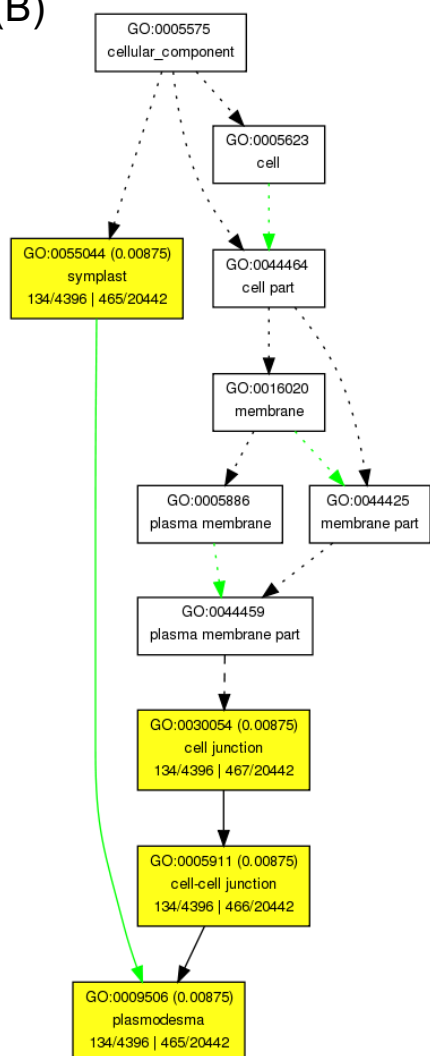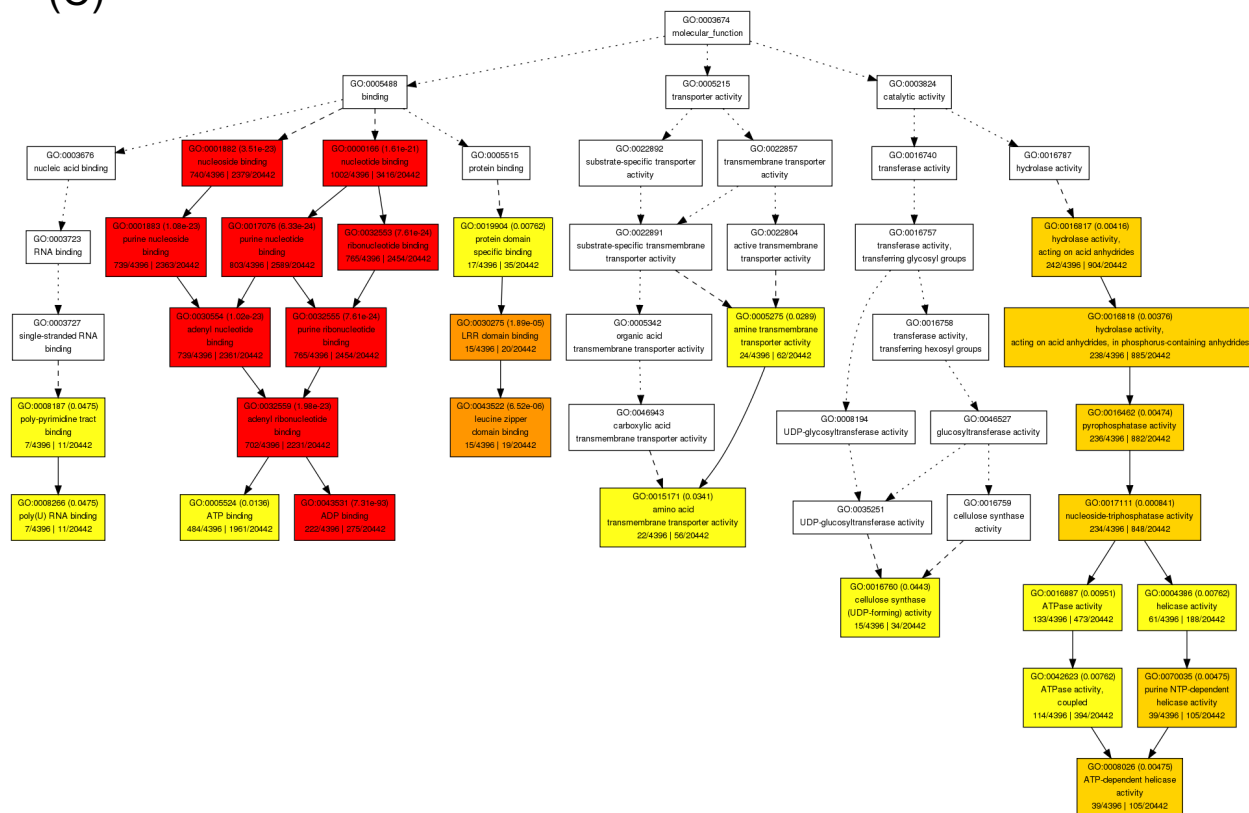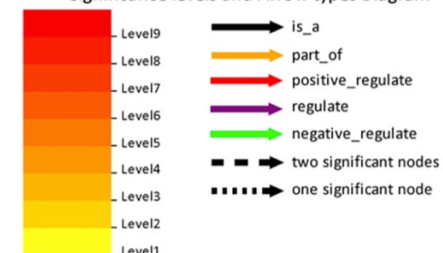

Figure S6

(A)

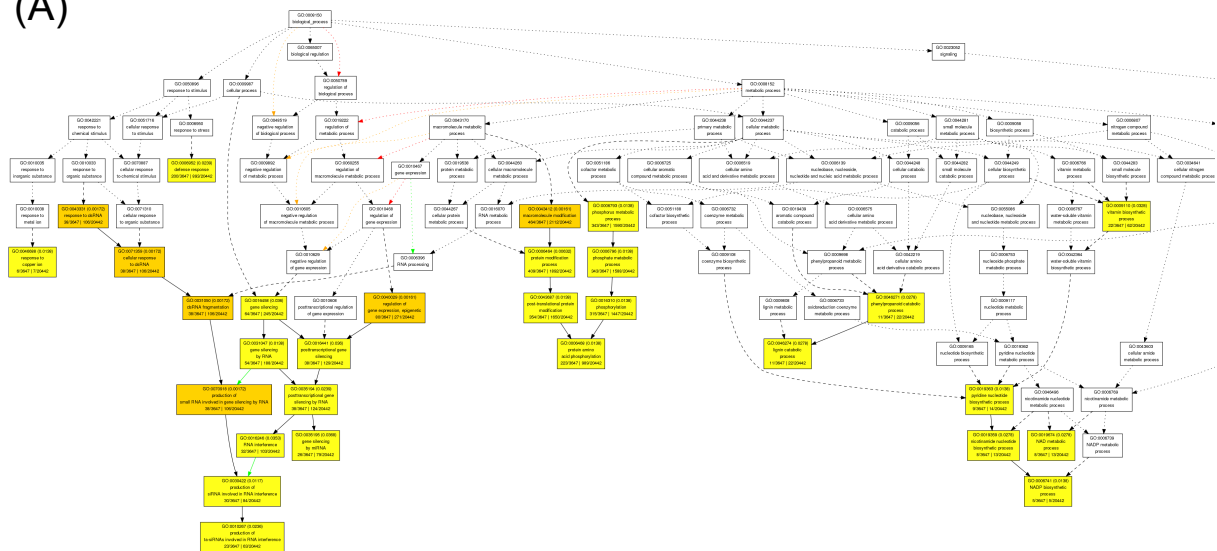

(B)

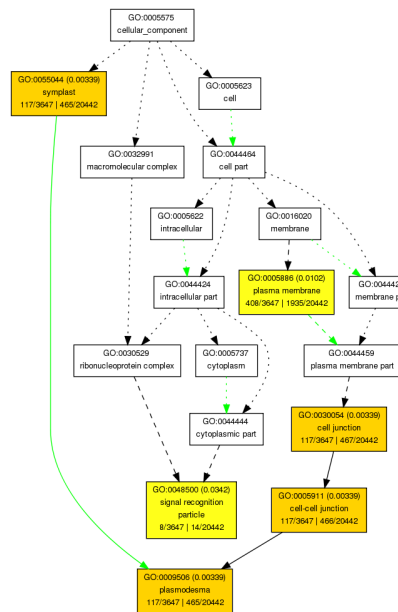

(C)

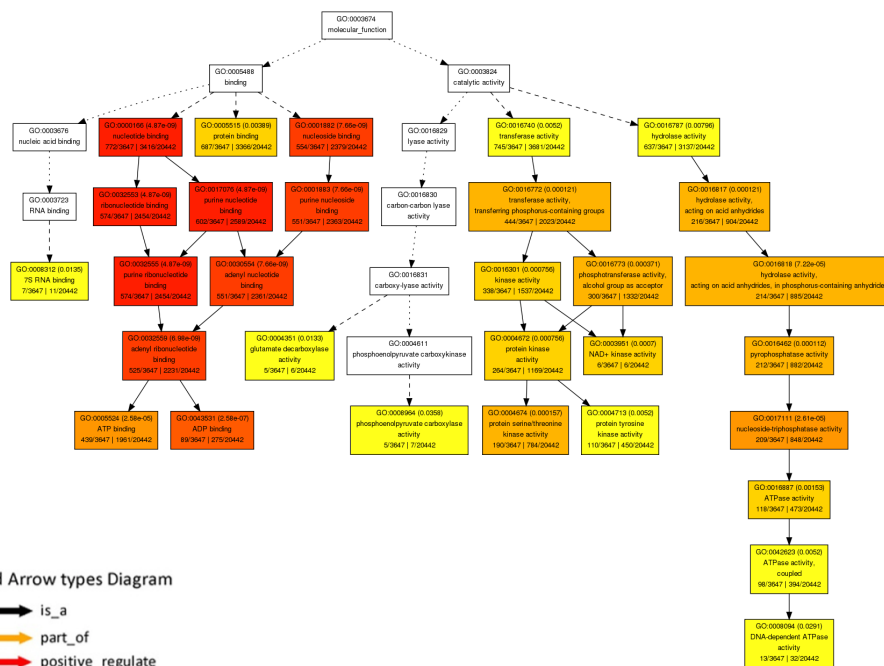

Significance levels and Arrow types Diagram

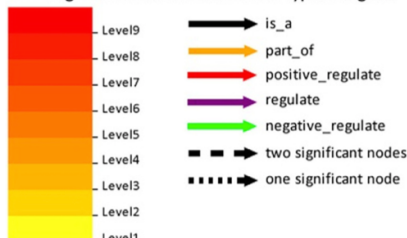

Figure S7
